# Supplementary material for: Relevance of feedbacks between water availability and crop systems using a coupled hydrology – crop growth model
Source: Copernicus journal article supplement (doi:10.5194/egusphere-2024-465), 2024-03-12
Supplement: Supplementary file 1 [file egusphere-2024-465-supplement.zip]

## Supplementary Information 1

Main input datasets used in PCR-GLOBWB 2 modules are described below:

| S.No | Datasets                                                                                                                         | Source                                               |
|------|----------------------------------------------------------------------------------------------------------------------------------|------------------------------------------------------|
| 1.   | Weather variables<br>- temperature<br>- precipitation<br>- reference potential evaporation                                       | ERA-Interim (Dee et al., 2011)                       |
| 2.   | Soil parameters (upper and lower layer)<br>- soil thickness<br>- residual soil moisture content<br>- soil moisture at saturation | FAO (2007) soil map;<br>Van Beek and Bierkens (2009) |
| 3.   | Land cover fractions<br>Land cover area                                                                                          | MIRCA2000 dataset (Portmann et al., 2010);           |

For detailed information, refer to Sutanudjaja et al.,( 2018).

## Supplementary Information II

The newly developed model framework integrates the PCR-GLOBWB 2 hydrological and water resources model with the WOFOST crop model through a one-way and two-way model coupling. Hydrological and crop simulations were conducted for each land-cover class, including maize, soybean, and wheat on a 5 arc-minute spatial resolution grid. To facilitate this integration, we employed a Basic Model Interface (BMI), chosen for its language independence, allowing for the coupling between PCR-GLOBWB 2 and WOFOST regardless of the programming language. This flexibility is exemplified by the WOFOST crop model being written in C language, while the PCR-GLOBWB 2 hydrological and water resources model is written in Python.

### BMI functions for the development of coupled PCR-GLOWB 2 - WOFOST model framework

The coupling of the WOFOST and PCRGLOBWB 2 models is achieved through BMI functions. The rationale for selecting BMI over alternative model coupling techniques lies in its non-invasive nature; no modifications are necessitated within the code. This non-

invasiveness ensures a flexible coupling framework, allowing for continuous model development without disrupting the coupling. Once BMI functions are incorporated into WOFOST and PCRGLOBWB 2, an ensemble of BMI functions becomes accessible for retrieving or altering (setting) information about model variables.

However, to establish a Python-based coupling framework, an additional wrapper was required. This wrapper serves to translate the model-specific BMI functions into Python-compatible information. The Babelizer wrapper (CSDMS, 2024) is specifically utilized in the WOFOST BMI. Conversely, no supplementary wrapper is needed in the PCRGLOBWB 2 BMI, as the model is inherently Python-compatible due to its programming language.

Babelizer, leveraging information from the babelizer input file, comprehensively details the WOFOST model. This input file contains crucial information such as the model library, entry point, packages, and author details. The necessary dependencies are then constructed to generate Python bindings, facilitated by the babelizer input file. Following the generation of Python bindings, the successful loading of the WOFOST BMI in Python is ensured through the building of the binding.

#### **Workflow of PCR-GLOBWB 2 - WOFOST model framework**

In the PCR-GLOBWB 2 - WOFOST coupling framework, the workflow following the implementation of BMI functions is consistent for both one-way and two-way coupling until the initialization of the hydrological and crop models (**Fig. S1**).

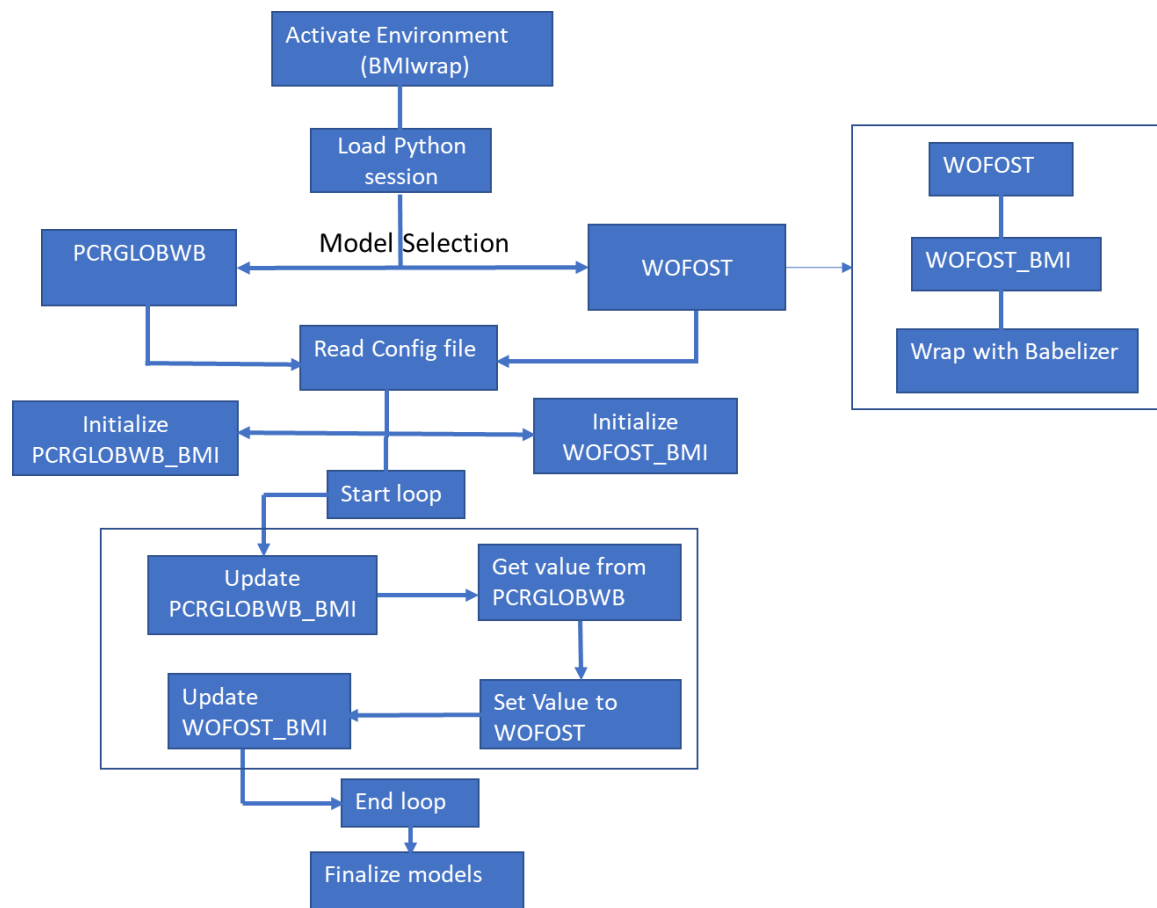

**Figure S1: Schematization of workflow of the coupled PCR-GLOBWB 2 - WOFOST model framework**

Before initiating the Python session, it is imperative to activate the BMI wrap environment, encompassing essential libraries requisite for both hydrological and crop models. Subsequently, the models PCR-GLOBWB 2 and WOFOST, along with their respective configuration files defining the model coupling settings, are loaded into the Python session. BMIwrap reads the configuration file, initializing the model-specific configuration settings before establishing both models as a coupled entity. Once the coupled models are initialized, a loop is initiated, commencing at the start time and concluding at the end time.

Within this loop, variable exchange occurs between the models based on the one-way or two-way coupling configuration. This iterative process ensures seamless information exchange between the PCR-GLOBWB 2 hydrological and water resources model and WOFOST crop model throughout the simulation period.

**Supplementary Information III**

Cultivars for each crop, namely maize, soybean, and wheat, were meticulously chosen by analyzing the cultivars present in the WOFOST crop parameter dataset against reported yield statistics. The selection process aimed to identify cultivars that closely matched the reported data, ensuring a representative and reliable set for inclusion in the study as presented for irrigated and rainfed maize (Fig. S2), soybean (Fig. S3) and wheat (Fig S4).

**Maize Irrigated**

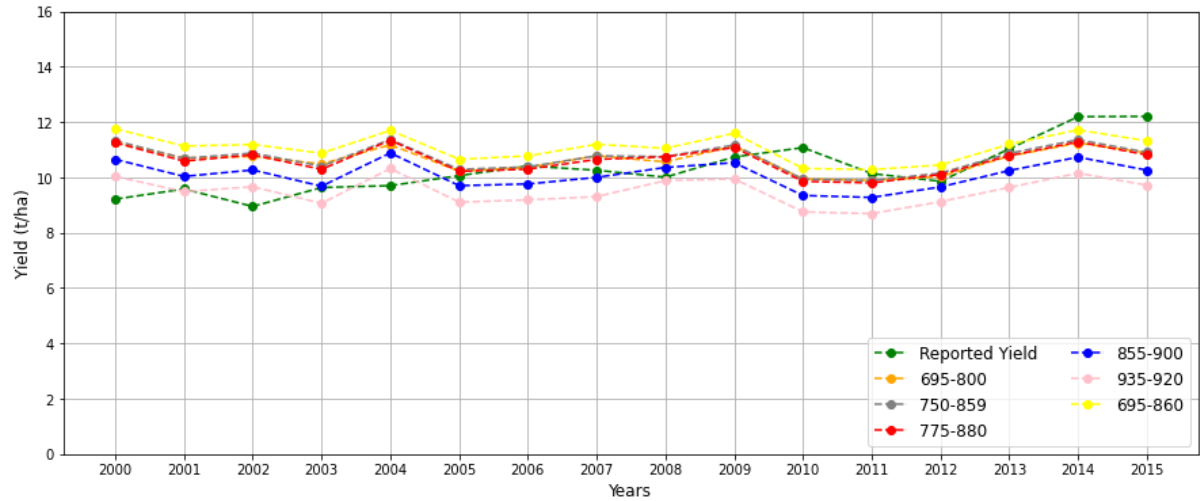

**Maize Rained**

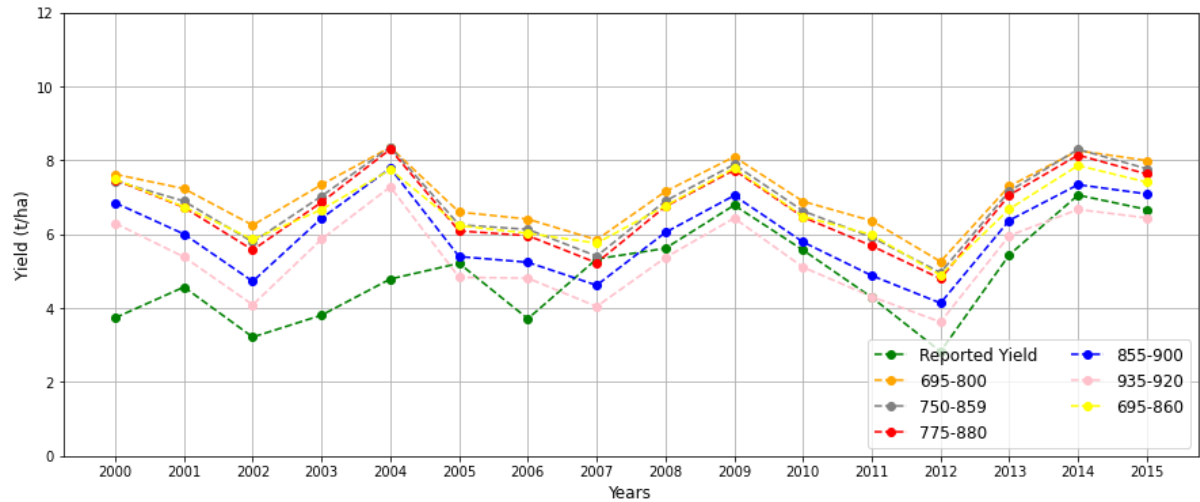

**Figure S2: Reported yield and simulated yield of cultivars for irrigated and rainfed maize.**

72 Soybean Irrigated

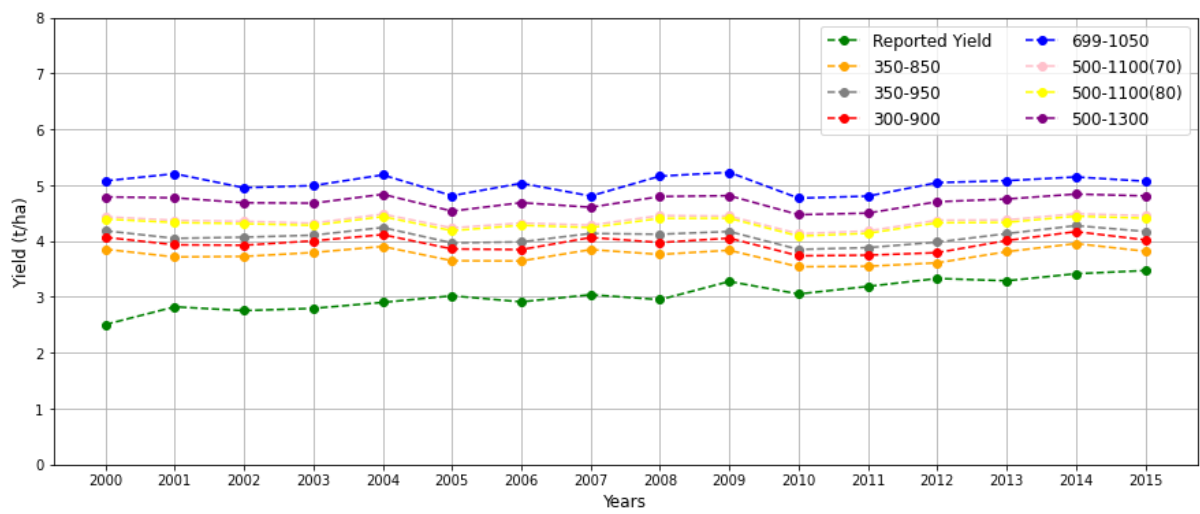

73

74 Soybean Rainfed

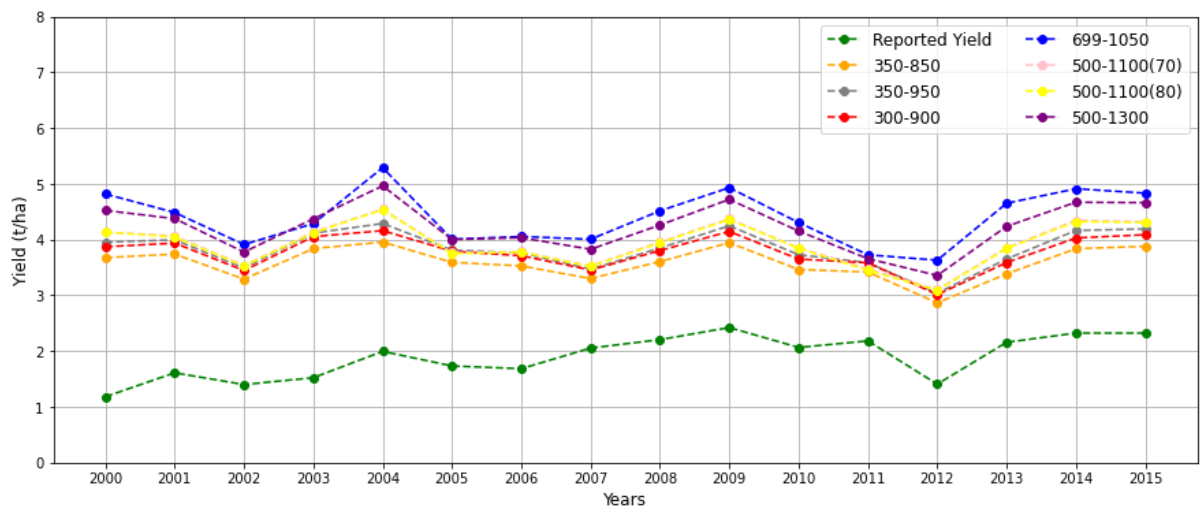

75

76 **Figure S3: Reported yield and simulated yield of cultivars for irrigated and rainfed soybean.**

77 Wheat Irrigated

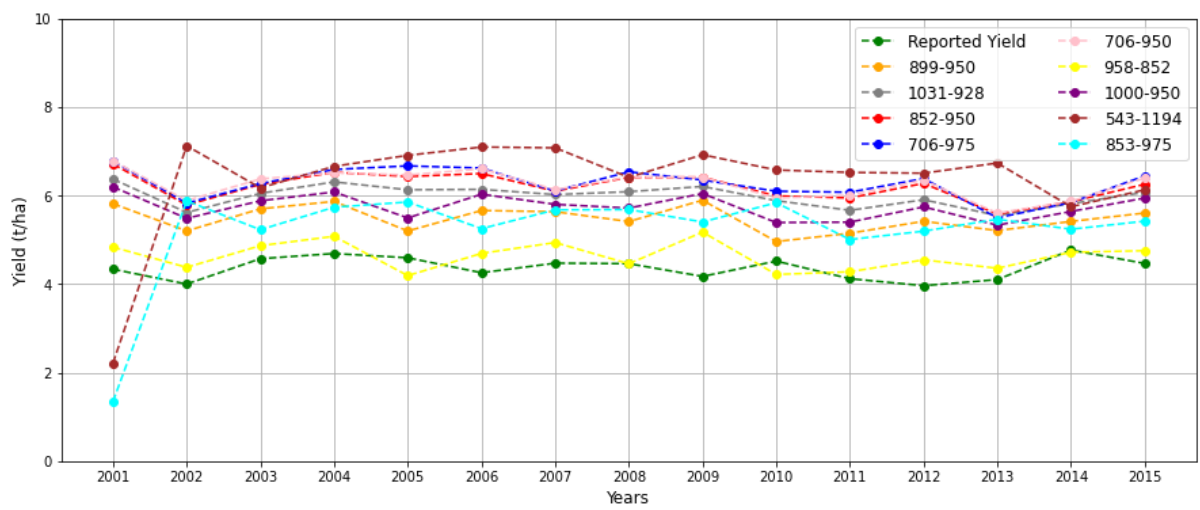

78

79      Wheat Rainfed

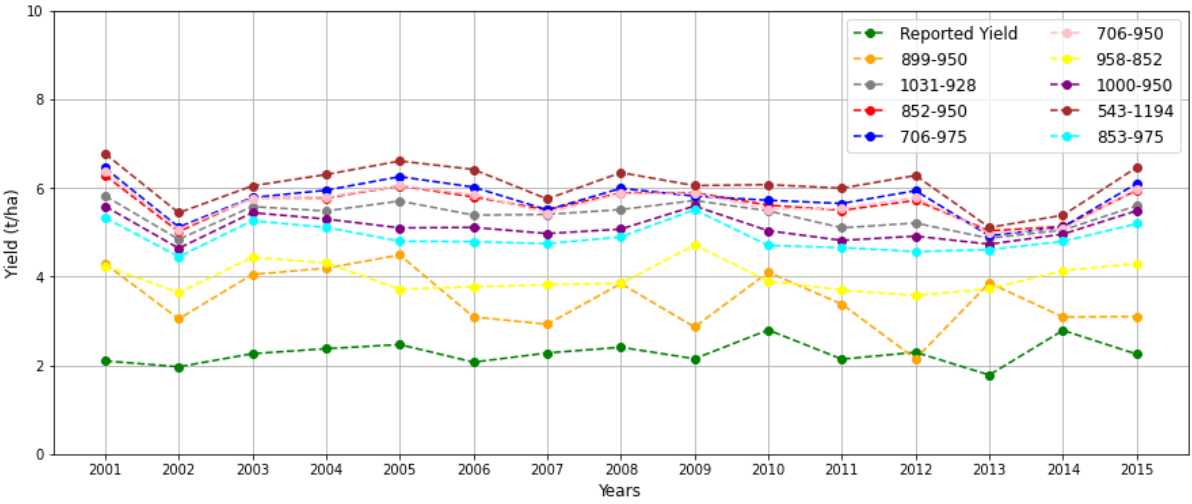

80

81      **Figure S4: Reported yield and simulated yield of cultivars for irrigated and rainfed wheat.**

82

83      **Supplementary Information IV**

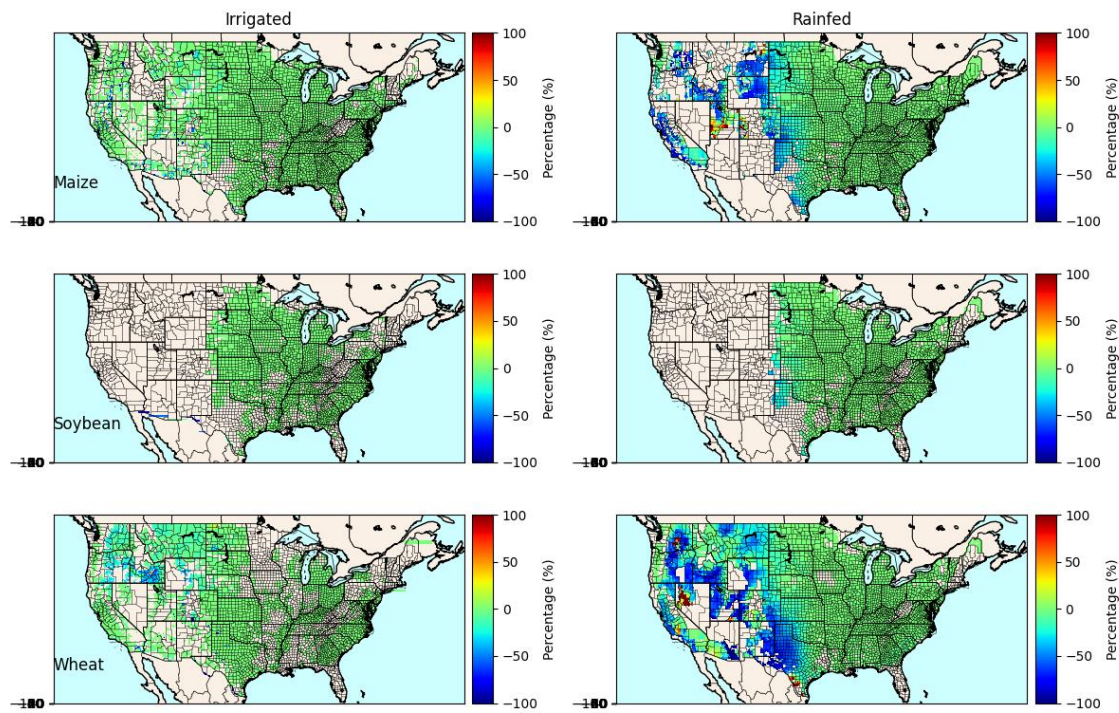

84

85      **Supplementary Figure S5: Relative difference in 1979-2019 mean between two-way and one-way**  
86      **coupling for irrigated and rainfed maize, soybean, and wheat crops.**

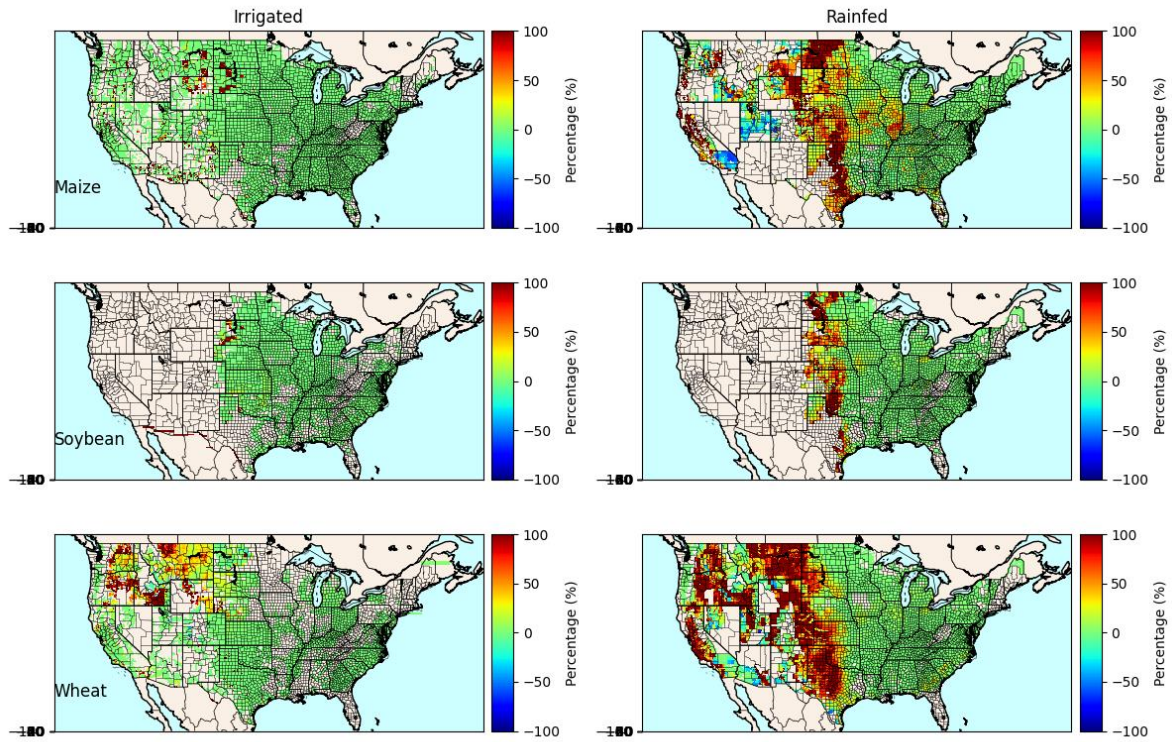

**Supplementary Figure S6: Relative difference in 1979-2019 Coefficient of variance (CV) between two-way and one-way coupling for irrigated and rainfed maize, soybean, and wheat crops.**



## Supplementary references

CSDMS : <https://babelizer.readthedocs.io/en/latest/example.html>, last access: 06 February 2024.

Dee, D. P., Uppala, S. M., Simmons, A. J., Berrisford, P., Poli, P., Kobayashi, S., Andrae, U., Balmaseda, M. A., Balsamo, G., Bauer, P., Bechtold, P., Beljaars, A. C. M., van de Berg, I., Biblot, J., Bormann, N., Delsol, C., Dragani, R., Fuentes, M., Greer, A. J., Haimberger, L., Healy, S. B., Hersbach, H., Holm, E. V., Isaksen, L., Kallberg, P., Kohler, M., Matricardi, M., McNally, A. P., Mong-Sanz, B. M., Morcette, J.-J., Park, B.-K., Peubey, C., de Rosnay, P., Tavolato, C., Thepaut, J. N., and Vitart, F.: The ERA-Interim reanalysis: Configuration and performance of the data assimilation system, *Q. J. Roy. Meteorol. Soc.*, 137, 553–597, <https://doi.org/10.1002/qj.828>, 2011.

Food and Agriculture Organization of the United Nations (FAO): Digital Soil Map of the World, Version 3.6. FAO, Rome, Italy, 2007.

Portmann, F. T., Siebert, S., and Döll, P.: MIRCA2000-Global monthly irrigated and rainfed crop areas around the year 2000: A new high-resolution data set for agricultural and hydrological modeling, *Global Biogeochem. Cy.*, 24, GB1011, <https://doi.org/10.1029/2008GB003435>, 2010.

van Beek, L. P. H. and Bierkens, M. F. P.: The Global Hydrological Model PCR-GLOBWB: Conceptualization, Parameterization and Verification, Tech. rep., Department of Physical Geography, Utrecht University, Utrecht, the Netherlands, <http://vanbeek.geo.uu.nl/supinfo/vanbeekbierkens2009.pdf> (last access: 15 September 2017), 2009.

Sutanudjaja, E. H., Van Beek, R., Wanders, N., Wada, Y., Bosmans, J. H. C., Drost, N., Van Der Ent, R. J., De Graaf, I. E. M., Hoch, J. M., De Jong, K., Karssenber, D., López López, P., Peßenteiner, S., Schmitz, O., Straatsma, M. W., Vannamettee, E., Wisser, D., & Bierkens, M. F. P. (2018). PCR-GLOBWB 2: A 5 arcmin global hydrological and water resources model. *Geoscientific Model Development*, 11(6), 2429–2453. <https://doi.org/10.5194/gmd-11-2429-2018>
