# Supplementary material for: Relevance of feedbacks between water availability and crop systems using a coupled hydrology – crop growth model
Source: Copernicus journal article supplement (doi:10.5194/egusphere-2024-465), 2024-03-12
Supplement: Supplementary file 2 [file egusphere-2024-465-supplement.zip]

Archive with 3 entries (3 files):
- Manuscript_Figures.7z
- Supplementary_Figures.7z
- Supplementary_information_SC.pdf
